# Supplementary material for: Layered Organic Conductors Based on BEDT-TTF and Ho, Dy, Tb Chlorides
Source: MDPI journal article supplement (doi:10.3390/magnetochemistry8110142), 2022-10-28
Supplement: s1 [file s1]

## Layered organic conductors based on BEDT-TTF and Ho, Dy, Tb chlorides

Alexandra M. Flakina\*, Elena I. Zhilyaeva\*, Gennady V. Shilov, Maxim A. Faraonov, Svetlana A. Torunova, Dmitri V. Konarev\*

Federal Research Center of Problems of Chemical Physics and Medicinal Chemistry, Russian Academy of Sciences, 142432 Chernogolovka, MD, Russia

Correspondence: [flakina@icp.ac.ru](mailto:flakina@icp.ac.ru) (A.M.F.); [zhilya@icp.ac.ru](mailto:zhilya@icp.ac.ru) (E.I.Z.); [konarev3@yandex.ru](mailto:konarev3@yandex.ru) (D.V.K.)

### Supplementary Materials

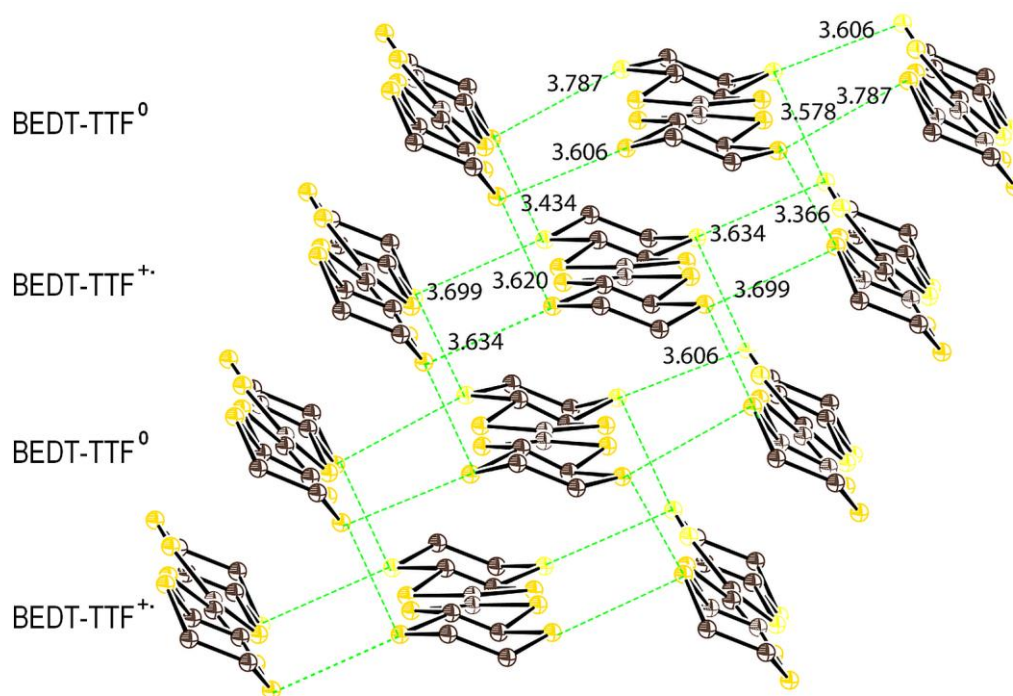

**Figure S1.** Formation of Van der Waals contacts in cation (BEDT-TTF<sup>+·</sup>) and neutral (BEDT-TTF<sup>0</sup>) chains, and between them for option (c) of the organic layer of compound **1**

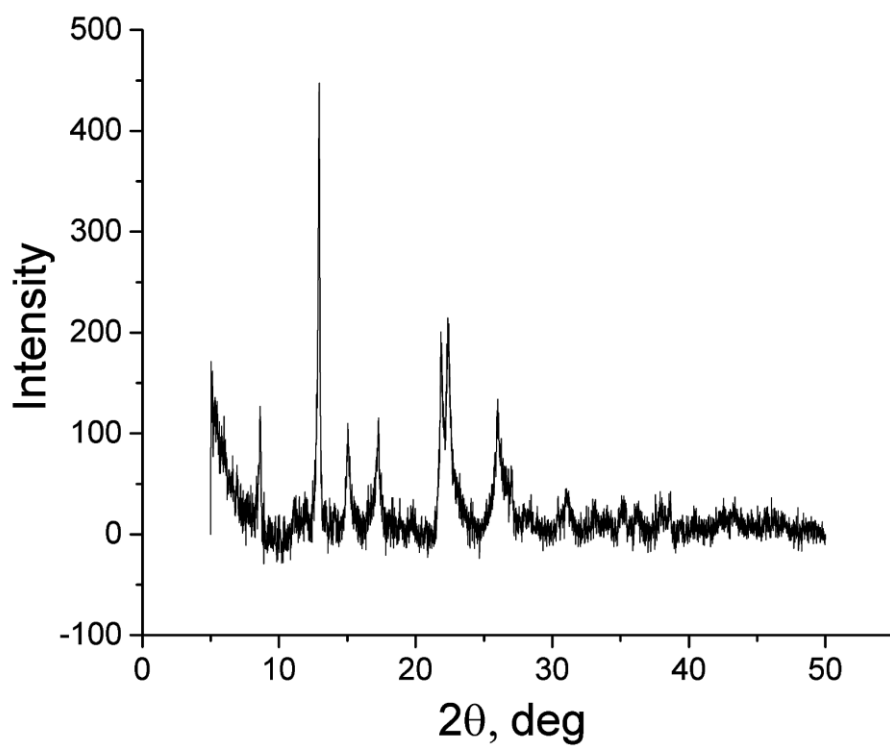

**Figure S2.** X-ray powder diffractogram for **2**.

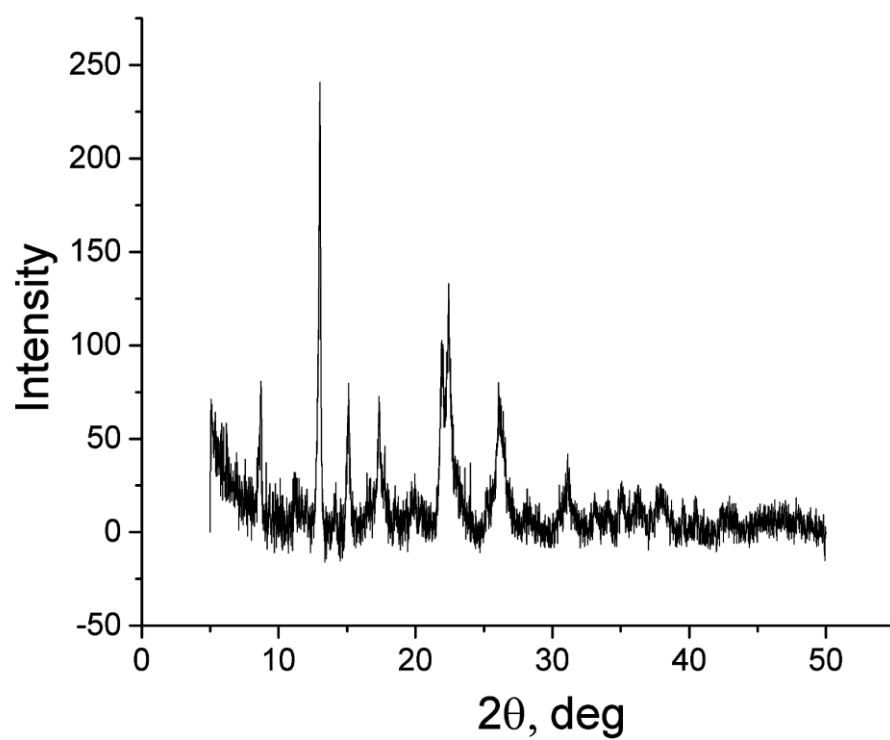

**Figure S3.** X-ray powder diffractogram for **3**.

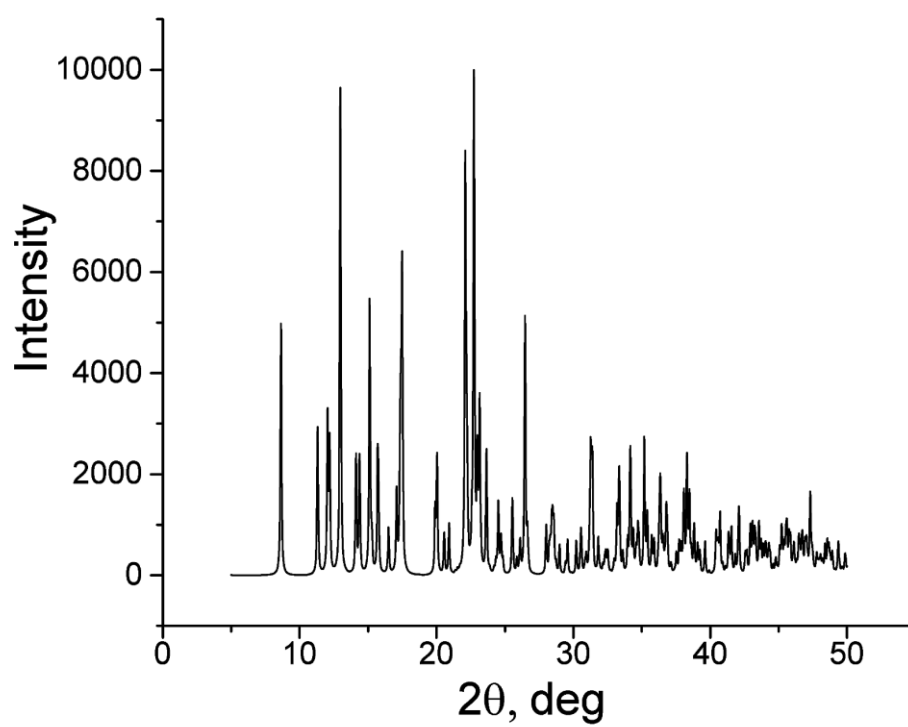

**Figure S4.** Simulated X-ray powder diffractogram for **1**.

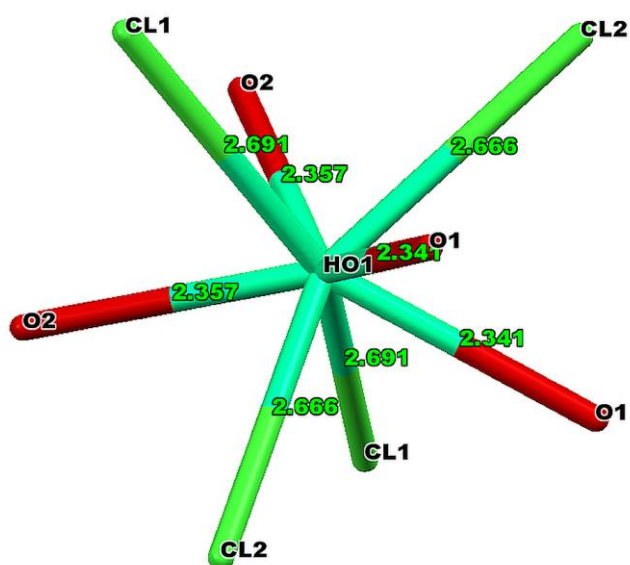

**Figure S5.** Structure of  $[\text{HoCl}_4(\text{H}_2\text{O})_4]^-$  anion in **4**.

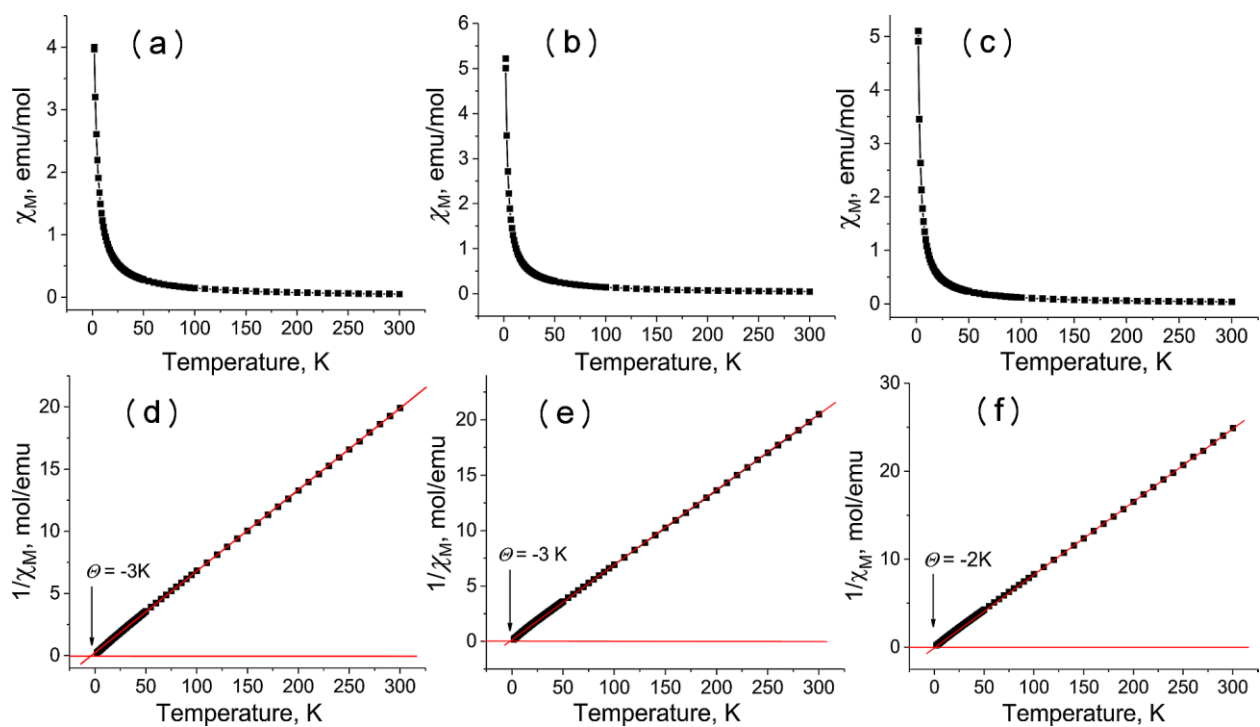

**Figure S6.** Temperature dependence of molar magnetic susceptibility (S6a, S6b, and S6c) and reciprocal molar magnetic susceptibility (S6d, S6e, S6f) for **1**, **2** and **3**.

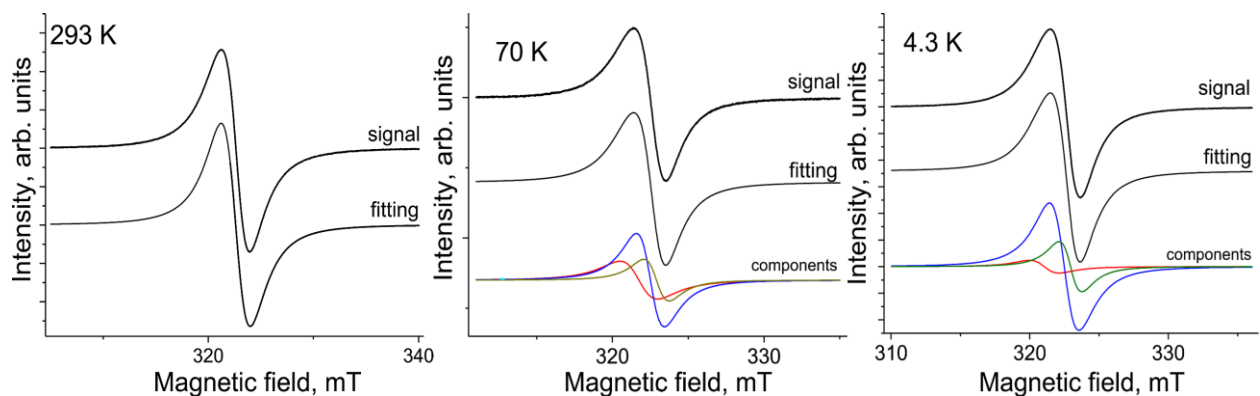

**Figure S7.** EPR signal from **2** at 293, 70 and 4.3 K. The approximation of the signal by one and three orange lines is shown at the bottom of the figures.

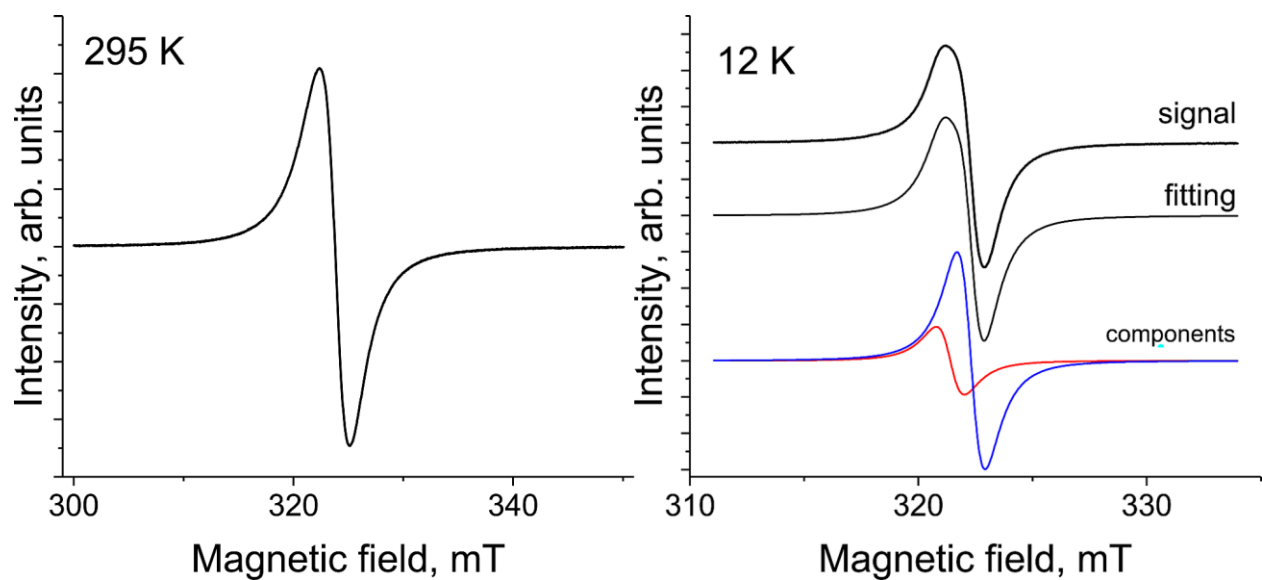

**Figure S8.** EPR signal from **3** (with terbium) at 12 and 295 K. The approximation of the signal at 12K by two Lorentz lines is shown at the bottom of the figure.

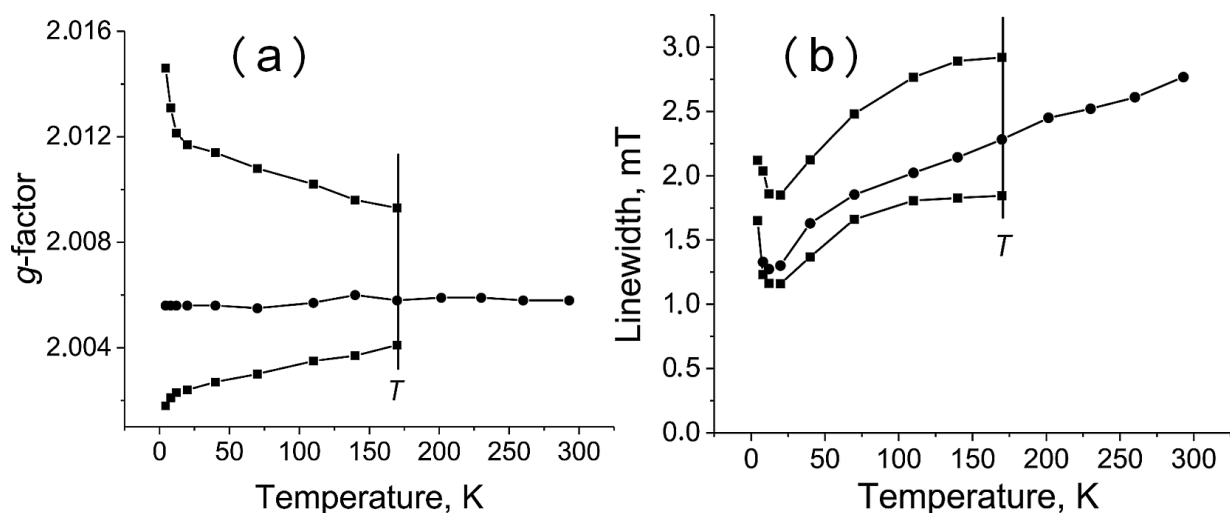

**Figure S9.** Temperature dependencies for parameters of EPR signal from **2** (with dysprosium): (a)  $g$ -factor and (b) the linewidth. “T” marks the temperature for splitting of EPR signal into three Lorentzian lines.

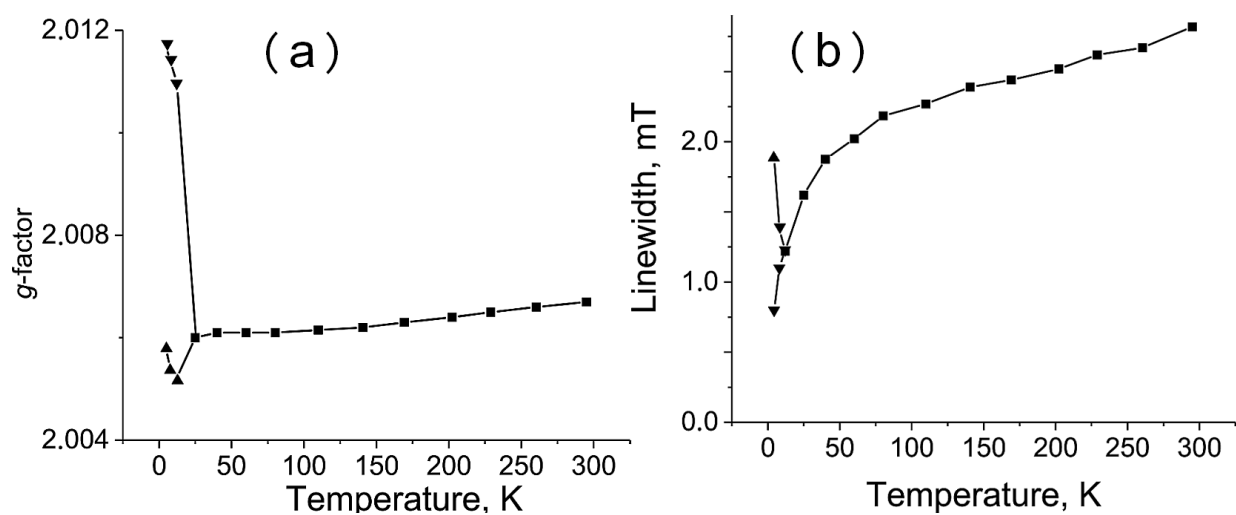

**Figure S10.** Temperature dependencies for parameters of EPR signal from **3**: (a)  $g$ -factor and (b) the linewidth.
